# Supplementary material for: Complement C3 Facilitates Stratification of Stages of Chronic Hepatitis B and Signifies Development of Acute-on-Chronic Liver Failure in Acute Decompensated Cirrhosis
Source: Springer Nature journal article supplement (doi:10.1007/s12325-022-02416-7), 2023-01-18
Supplement: MOESM1 [file 12325_2022_2416_MOESM1_ESM.pdf]

## **COVER PAGE**

### **Supplemental Materials**

**Title:** Complement C3 Facilitates Stratification of Stages of Chronic Hepatitis B and Signifies Development of Acute-on-Chronic Liver Failure in Acute Decompensated Cirrhosis

Chong Chen, Zhu Yuan, Weixia Li, Ling Fei, Liujuan Ji, Qin Huang, Shuye Zhang, Liang Chen

Chong Chen and Zhu Yuan are co-first authors.

Liang Chen and Shuye Zhang are joint corresponding Authors.

**Department of Infectious Diseases, Shanghai Public Health Clinical Centre, Fudan University, Shanghai 201508, China**

Chong Chen, Weixia Li & Qin Huang

**Department of Endocrinology, Jinshan Branch of Shanghai Sixth People's Hospital, Shanghai 201599, China**

Zhu Yuan

**Department of Hepatology, Shanghai Public Health Clinical Centre, Fudan University, Shanghai 201508, China**

Ling Fei & Liang Chen

**Department of Severe Liver Disease, Shanghai Public Health Clinical Centre,  
Fudan University, Shanghai 201508, China**

Liujuan Ji

**Clinical Center for BioTherapy, Zhongshan Hospital, Fudan University,  
Shanghai 200031, China.**

Shuye Zhang

**Corresponding Authors:** Prof Liang Chen and Prof Shuye Zhang.

Shanghai Public Clinical Centre, 2901 Caolang Road, Jin-Shan District, Shanghai  
201508, P.R. China and Clinical Center for BioTherapy, Zhongshan Hospital, Fudan  
University. No.180 Fengling Road, Xuhui District, Shanghai 200031, China.

E-mail: [chenliang@shphc.org.cn](mailto:chenliang@shphc.org.cn) and [shuye\\_zhang@fudan.edu.cn](mailto:shuye_zhang@fudan.edu.cn). Tel:  
+86(21)57248785; Fax: +86(21)57248782.

### **Definition of ACLF Grades**

ACLF grades were defined according to the COSSH (Chinese group on the study of severe hepatitis B) criteria (*Gut. 2018;67:2181-2191*). Detailed content is as follows:

**ACLF grade 1:** including: (a) patients with kidney failure alone; (b) patients with single liver failure with an INR  $\geq 1.5$  and/or kidney dysfunction and/or HE grade I or II; (c) patients with single type of organ failure of the coagulation, circulatory or respiratory systems and/or kidney dysfunction and/or HE grade I or II and (d) patients with cerebral failure alone plus kidney dysfunction.

**ACLF grade 2:** Patients with failures of two organ systems.

**ACLF grade 3:** Patients with failures of 3 or more organ systems.

**Supplementary table 1. Baseline characteristics, laboratory parameters of 223 HBV-C-ACLF patients.**

| Parameters                                  | Total ACLFs<br>(n=223) | ACLF-1 (n=133) | ACLF-2 (n=64) | ACLF-3 (n=26) | <i>P</i> value |
|---------------------------------------------|------------------------|----------------|---------------|---------------|----------------|
| Age (y)                                     | 52 (45-62)             | 52 (46-52)     | 50 ± 11.5     | 57 ± 12       | 0.060          |
| Gender (male, %)                            | 170 (76.2)             | 99 (74.4)      | 47 (73.4)     | 24 (92.3)     | 0.121          |
| HBe Ag (+), n (%)                           | 63 (28.3)              | 39 (29.3)      | 17 (26.6)     | 7 (26.9)      | 0.910          |
| HBV DNA, (IU/mL)                            |                        |                |               |               |                |
| < 500                                       | 54 (24.2)              | 34 (25.6)      | 13 (20.3)     | 7 (26.9)      | 0.262          |
| 500-10 <sup>5</sup>                         | 108 (48.4)             | 60 (45.1)      | 32 (50.0)     | 16 (61.5)     |                |
| > 10 <sup>5</sup>                           | 61 (27.4)              | 39 (29.3)      | 19 (29.7)     | 3 (11.5)      |                |
| Clinical complications at enrollment, n (%) |                        |                |               |               |                |
| Ascites                                     | 171 (76.7)             | 89 (66.9)      | 57 (89.1)     | 25 (96.2)     | < 0.001        |
| Bacterial infection                         | 68 (30.5)              | 9 (6.8)        | 33 (51.6)     | 22 (84.6)     | < 0.001        |
| Hepatic encephalopathy                      | 97 (43.5)              | 37 (27.8)      | 42 (65.6)     | 18 (69.2)     | < 0.001        |

|                              |                  |                  |                  |                    |         |
|------------------------------|------------------|------------------|------------------|--------------------|---------|
| Gastrointestinal             |                  |                  |                  |                    |         |
| haemorrhage                  | 7 (3.1)          | 4 (3.0)          | 1 (1.6)          | 2 (7.7)            | 0.316   |
| Laboratory parameters        |                  |                  |                  |                    |         |
| ALT, U/L                     | 139 (48-473)     | 117 (41-449)     | 174 (63-750)     | 90 (62-285)        | 0.086   |
| AST, U/L                     | 120 (62-286)     | 114 (58-258)     | 156 (83-477)     | 120 (71-237)       | 0.087   |
| Tbil, mg/dL                  | 21.2 (11.5-29.6) | 15.5 (9.1-25.6)  | 24.7 (18.3-32.0) | 30.5 (19.5-41.1)   | < 0.001 |
| Albumin, g/L                 | 31.4 (28.2-35.0) | 31.8 ± 5.3       | 32.2 ± 4.5       | 30.6 (26.8-33.6)   | 0.331   |
| INR                          | 2.14 (1.63-2.95) | 1.72 (1.43-2.12) | 3.56 ± 1.61      | 2.87 (2.59-3.94)   | < 0.001 |
| Creatinine, µmol/L           | 63.9 (50.4-79.8) | 61.0 (48.8-73.4) | 61.2 (50.3-77.2) | 142 (71.0-260.0)   | < 0.001 |
| Urea, mmol/L                 | 5.09 (3.44-7.03) | 4.85 (3.47-6.33) | 5.31 ± 3.14      | 10.14 (6.83-13.98) | < 0.001 |
| Glucose, mmol/L              | 6.83 (5.03-8.56) | 6.65 (4.86-8.95) | 7.34 (5.18-8.48) | 6.52 (5.64-8.34)   | 0.838   |
| WBC, 10 <sup>9</sup> /L      | 6.08 (4.40-8.35) | 5.31 (3.63-7.53) | 8.06 ± 4.51      | 8.07 (5.63-12.77)  | < 0.001 |
| Haemoglobin, g/L             | 115 ± 22         | 116 ± 21         | 115 ± 22         | 109 (89-118)       | 0.029   |
| Platelet, 10 <sup>9</sup> /L | 88 (51-135)      | 107 ± 66         | 87 ± 40          | 61 (44-107)        | < 0.001 |

|                       |                  |               |                |                  |         |
|-----------------------|------------------|---------------|----------------|------------------|---------|
| C3, g/L               | 0.36 (0.25-0.55) | 0.53 ± 0.28   | 0.33 ± 0.15    | 0.26 ± 0.11      | < 0.001 |
| Prognostic score      |                  |               |                |                  |         |
| COSSH-ACLFs           | 7.8 (6.5-9.9)    | 6.7 (5.8-7.5) | 9.9 (8.8-10.6) | 11.8 (10.5-14.3) | < 0.001 |
| COSSH ACLF IIs        | 7.3 (6.5-8.3)    | 6.7 (6.3-7.4) | 8.4 (7.5-8.9)  | 9.6 (8.1-10.3)   | < 0.001 |
| Poor prognosis        |                  |               |                |                  |         |
| 28-days mortality     | 114 (51.1)       | 42 (31.6)     | 48 (75.0)      | 24 (92.3)        | < 0.001 |
| Liver transplantation | 22 (9.9)         | 9 (6.8)       | 11 (17.2)      | 2 (7.7)          | 0.066   |

**NOTE:** The groups of patients with ACLF of cirrhosis were named as HBV-C-ACLF. Data are presented as the median (Q1-Q3) or the number of patients (%). The continuous data between two groups were compared by t-test or Mann-Whitney-test. The categorical data between two groups were compared with Chi-square test or Fisher's exact test.

**Abbreviations:** ACLF, acute-on-chronic liver failure; ALT, alanine aminotransferase; AST, aspartate aminotransferase; Tbil, total bilirubin; INR, international normalised ratio; WBC, white blood cells; C3, complement component 3; COSSH, Chinese group on the study of severe hepatitis B.

**Supplementary table 2. Comparison of the characteristics between patients with and without poor prognosis among HBV-C-ACLFs.**

| Parameters                                  | Patients with poor<br>prognosis (n=136) | Patients without<br>poor prognosis<br>(n=87) | <i>P</i> value |
|---------------------------------------------|-----------------------------------------|----------------------------------------------|----------------|
| Age (y)                                     | 52 (44-61)                              | 51 (45-64)                                   | 0.503          |
| Gender (male, %)                            | 108 (79.4)                              | 62 (71.2)                                    | 0.109          |
| HBe Ag (+), n (%)                           | 38 (27.9)                               | 25 (28.7)                                    | 0.508          |
| HBV DNA, (IU/mL)                            |                                         |                                              |                |
| < 500                                       | 33 (24.3)                               | 21 (24.1)                                    | 0.651          |
| 500-10 <sup>5</sup>                         | 63 (46.3)                               | 45 (51.7)                                    |                |
| > 10 <sup>5</sup>                           | 40 (29.4)                               | 21 (24.1)                                    |                |
| Clinical complications at enrollment, n (%) |                                         |                                              |                |
| Ascites                                     | 120 (88.2)                              | 51 (58.6)                                    | < 0.001        |
| Bacterial infection                         | 53 (39.0)                               | 15 (17.2)                                    | < 0.001        |
| Hepatic<br>encephalopathy                   | 87 (64.0)                               | 10 (11.5)                                    | < 0.001        |
| Gastrointestinal<br>haemorrhage             | 7 (5.1)                                 | 0                                            | < 0.05         |
| Laboratory parameters                       |                                         |                                              |                |
| ALT, U/L                                    | 140 (49-551)                            | 137 (47-425)                                 | 0.579          |
| AST, U/L                                    | 131 (75-341)                            | 114 (57-225)                                 | 0.058          |

|                              |                  |                  |         |
|------------------------------|------------------|------------------|---------|
| Tbil, mg/dL                  | 25.0 ± 13.1      | 15.3 ± 9.9       | < 0.001 |
| Albumin, g/L                 | 31.5 ± 5.0       | 32.0 ± 4.9       | 0.579   |
| INR                          | 2.63 (1.95-3.58) | 1.63 (1.39-1.91) | 0.544   |
| Creatinine, µmol/L           | 64.6 (51.7-83.9) | 61.9 (48.1-77.4) | 0.102   |
| Urea, mmol/L                 | 5.58 (3.71-8.07) | 4.47 (3.29-5.82) | < 0.01  |
| Glucose, mmol/L              | 7.0 (5.23-8.39)  | 6.62 (4.80-9.15) | 0.544   |
| WBC, 10 <sup>9</sup> /L      | 6.98 (4.77-9.64) | 5.26 (3.42-6.94) | < 0.001 |
| Haemoglobin, g/L             | 112 ± 22         | 119 ± 20         | < 0.05  |
| Platelet, 10 <sup>9</sup> /L | 87 ± 44          | 114 ± 72         | < 0.01  |
| C3, g/L                      | 0.33 (0.23-0.43) | 0.54 (0.31-0.71) | < 0.001 |
| Prognostic score             |                  |                  |         |
| COSSH-ACLFs                  | 9.3 (7.8-10.7)   | 6.4 (5.5-7.0)    | < 0.001 |
| COSSH ACLF IIs               | 8.1 (7.3-8.9)    | 6.5 (6.1-7.1)    | < 0.001 |

**NOTE:** The groups of patients with ACLF of cirrhosis were named as HBV-C-ACLF.

The poor prognosis of patients was defined as mortality or liver transplantation within 28 days after admission. Data are presented as the median (Q1-Q3) or the number of patients (%). The continuous data between two groups were compared by t-test or Mann-Whitney-test. The categorical data between two groups were compared with Chi-square test or Fisher's exact test.

**Abbreviations:** ACLF, acute-on-chronic liver failure; ALT, alanine aminotransferase; AST, aspartate aminotransferase; Tbil, total bilirubin; INR, international normalised ratio; WBC, white blood cells; C3, complement component 3; COSSH, Chinese group on the



study of severe hepatitis B.

**Supplementary table 3. Comparison of the characteristics between discovery and validation cohorts in the patients with acute decompensated cirrhosis.**

| Parameters                                  | Discovery<br>cohort (n=119) | Validation<br>cohort (n=86) | <i>P</i> value |
|---------------------------------------------|-----------------------------|-----------------------------|----------------|
| Age (y)                                     | 59 (48-71)                  | 56 (47-64)                  | < 0.05         |
| Gender (male, %)                            | 66 (55.5)                   | 55 (64.0)                   | 0.251          |
| HBe Ag (+), n (%)                           | 45 (37.8)                   | 26 (30.2)                   | 0.299          |
| HBV DNA, (IU/mL)                            |                             |                             |                |
| < 500                                       | 43 (36.1)                   | 34 (39.5)                   | 0.767          |
| 500-10 <sup>5</sup>                         | 46 (38.7)                   | 29 (33.7)                   |                |
| > 10 <sup>5</sup>                           | 30 (25.2)                   | 23 (26.7)                   |                |
| Clinical complications at enrollment, n (%) |                             |                             |                |
| Ascites                                     | 84 (70.6)                   | 59 (68.6)                   | 0.761          |
| Bacterial infection                         | 25 (21.8)                   | 17 (19.8)                   | 0.863          |
| Hepatic encephalopathy                      | 30 (25.2)                   | 16 (18.6)                   | 0.310          |
| Gastrointestinal haemorrhage                | 4 (3.4)                     | 1 (1.2)                     | 0.401          |
| Laboratory parameters                       |                             |                             |                |
| ALT, U/L                                    | 102 (33–211)                | 91 (26-178)                 | 0.213          |
| AST, U/L                                    | 89 (25–177)                 | 67 (18-142)                 | 0.071          |
| Tbil, mg/dL                                 | 3.92 ± 2.20                 | 4.98 (2.21-8.10)            | 0.124          |
| Albumin, g/L                                | 30.9 (27.6-35.8)            | 31.0 (26.8-39.3)            | 0.780          |
| INR                                         | 1.42 (1.30 ± 1.62)          | 1.39 (1.22-1.54)            | 0.122          |

|                               |                  |                  |       |
|-------------------------------|------------------|------------------|-------|
| Creatinine, $\mu\text{mol/L}$ | 60.1 (45.9-72.3) | 70.0 (52.1-90.1) | 0.080 |
| Urea, $\text{mmol/L}$         | 3.10 (2.70-4.92) | 3.33 (2.89-5.44) | 0.335 |
| Glucose, $\text{mmol/L}$      | 6.09 (4.91-8.07) | 5.90 (5.10-7.89) | 0.761 |
| WBC, $10^9/\text{L}$          | 5.61 (4.10-7.34) | 5.71 (4.22-7.68) | 0.672 |
| Haemoglobin, $\text{g/L}$     | $109 \pm 16$     | $106 \pm 14$     | 0.090 |
| Platelet, $10^9/\text{L}$     | 94 (62-139)      | 101 (70-151)     | 0.553 |
| C3, $\text{g/L}$              | $0.72 \pm 0.25$  | $0.63 \pm 0.29$  | 0.489 |
| Prognostic score              |                  |                  |       |
| COSSH-ACLFs                   | 5.8 (4.8-6.1)    | 5.8 (5.2-6.2)    | 0.317 |
| COSSH ACLF IIs                | 5.2 (4.8-6.0)    | 5.1 (4.6-6.4)    | 0.998 |

**NOTE:** Data are presented as the median (Q1-Q3) or the number of patients (%). The continuous data between two groups were compared by t-test or Mann-Whitney-test. The categorical data between two groups were compared with Chi-square test or Fisher's exact test. (**NOTICE:** The validation cohort was screened and enrolled between January 2022 to June 2022 from the Department of Hepatology and Department of Severe Liver Disease, Shanghai Public Health Clinical Centre, Fudan University, Shanghai, China. 86 patients with acute decompensated cirrhosis were qualified in the validation cohort.)

**Abbreviations:** AD, acute decompensation; ACLF, acute-on-chronic liver failure; ALT, alanine aminotransferase; AST, aspartate aminotransferase; Tbil, total bilirubin; INR, international normalised ratio; PT, prothrombin; WBC, white blood cells; C3, complement component 3; COSSH, Chinese group on the study of severe hepatitis B.

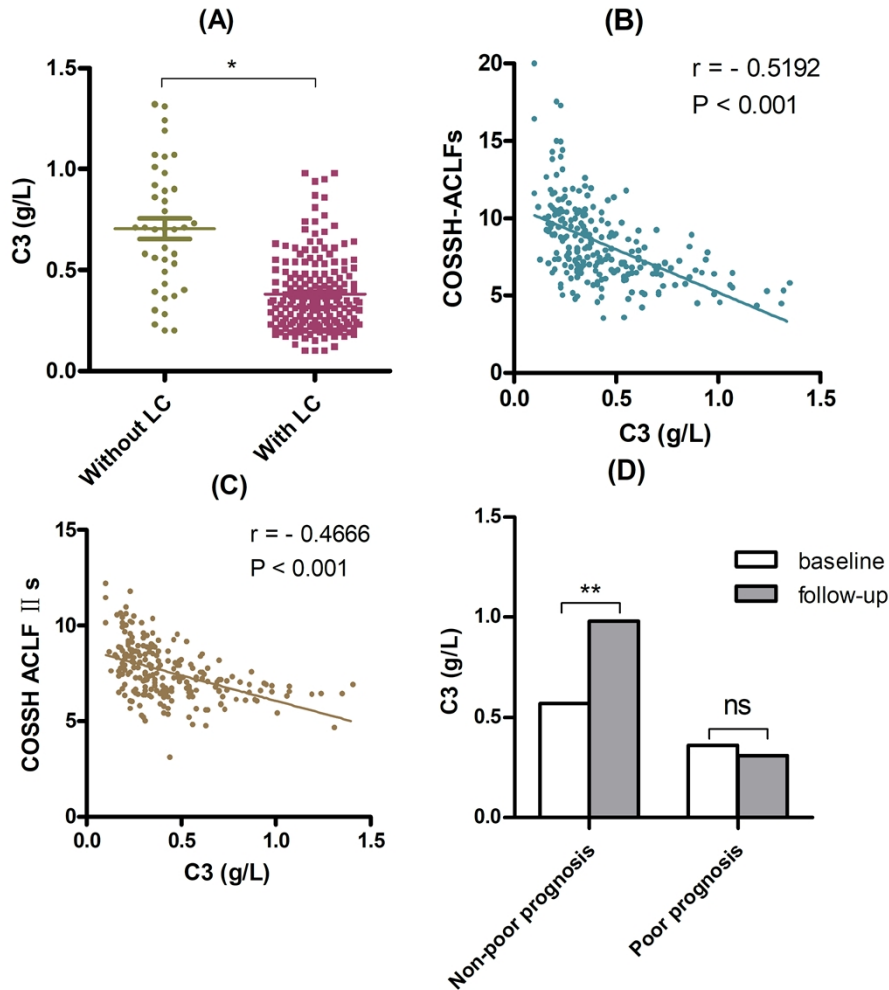

**Supplementary figure 1. Association of liver complications, ACLF scores and prognosis of disease with C3 levels in patients with HBV-C-ACLF.**

(A) Patients with liver complications had significant lower C3 levels; (B) A significant negative correlation between C3 levels and COSSH-ACLFs; (C) A significant negative correlation between C3 levels and COSSH ACLF IIs; (D) C3 levels variation by clinical outcomes of disease in patients with HBV-C-ACLF.

**NOTE:** The groups of patients with ACLF of cirrhosis were named HBV-C-ACLF.

The poor prognosis of patients was defined as mortality or liver transplantation within

28 days after admission. \*, < 0.05; \*\*, < 0.01; ns, not significant.

**Abbreviations:** C3, complement component 3; LC, liver complication; COSSH, Chinese group on the study of severe hepatitis B.

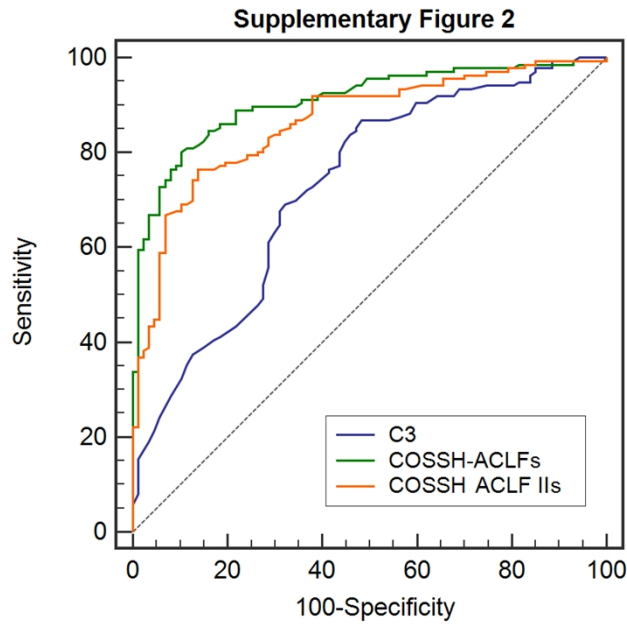

| Predictors           | Poor prognosis of HBV-C-ACLFs |           |
|----------------------|-------------------------------|-----------|
|                      | auROC                         | 95 CI%    |
| C3                   | 0.73                          | 0.66-0.80 |
| COSSH-ACLFs          | 0.91                          | 0.87-0.95 |
| COSSH ACLF IIs       | 0.86                          | 0.82-0.91 |
| C3 vs COSSH-ACLFs    | $P = 0.0001$                  |           |
| C3 vs COSSH ACLF IIs | $P = 0.0002$                  |           |

**Supplementary figure 2. ROC curves for predicting the poor prognosis of 223 HBV-C-ACLF patients.**

**NOTE:** The groups of patients with ACLF of cirrhosis were named HBV-C-ACLF. The poor prognosis of patients was defined as mortality or liver transplantation within 28 days after admission. AuROCs for different models were calculated and compared using the Z test (Delong's method).

**Abbreviations:** C3, complement component 3; COSSH, Chinese group on the study of severe hepatitis B; ACLF, acute-on-chronic liver failure; auROC, the area under the receiver operating characteristic.

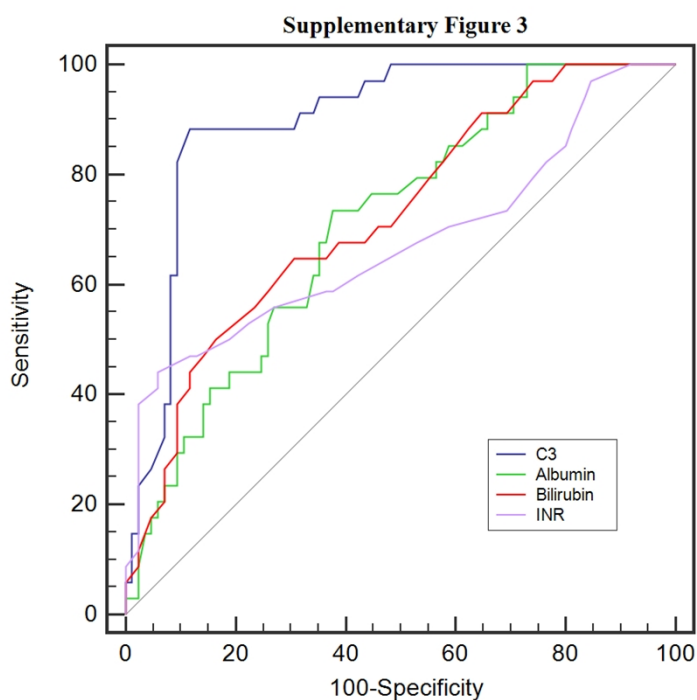

**Supplementary figure 3. ROC curves for development of ACLF in 119 HBV-C-AD patients.**

| Predictors      | Development of ACLF in patients with decompensated cirrhosis |           |
|-----------------|--------------------------------------------------------------|-----------|
|                 | auROC                                                        | 95 CI%    |
| C3              | 0.90                                                         | 0.84-0.96 |
| Bilirubin       | 0.72                                                         | 0.62-0.82 |
| INR             | 0.68                                                         | 0.56-0.80 |
| Albumin         | 0.71                                                         | 0.61-0.81 |
| C3 vs Bilirubin | $P = 0.0053$                                                 |           |
| C3 vs INR       | $P = 0.0024$                                                 |           |
| C3 vs Albumin   | $P = 0.0026$                                                 |           |

**Note:** Follow up the HBV-C-AD patients to establish whether they developed ACLF within 28 days after admission. AuROCs for different models were calculated and compared using the Z test (DeLong's method).

**Abbreviations:** C3, complement component 3; AD, acute decompensation; ACLF, acute-on-chronic liver failure; INR, international normalised ratio; auROC, the area under the receiver operating characteristic.
